# Supplementary material for: Accelerating Bayesian inference of dependency between mixed-type biological traits
Source: PubMed Central journal article supplement (PMC10491301; doi:10.1371/journal.pcbi.1011419), 2023-08-28
Supplement: pcbi.1011419.s001.pdf [file pcbi.1011419.s001.pdf]

## Auto-tuning of $r$

We describe a simple heuristic to auto-tune the step size ratio  $r$  on the fly. Let  $\Sigma_G$  and  $\Sigma_L$  be the covariance matrices for  $\mathbf{x}_G$  and  $\mathbf{x}_L$  respectively, then their minimal eigenvalues  $\lambda_{\min,G}$  and  $\lambda_{\min,L}$  describe the variance magnitude in the most constrained direction. Intuitively, for both HMC and Zigzag-HMC, the step size should be proportional to the diameter of this most constrained density region, which is  $\sqrt{\lambda_{\min,G}}$  or  $\sqrt{\lambda_{\min,L}}$ . Therefore we propose a choice of  $r = \sqrt{\lambda_{\min,L}}/\sqrt{\lambda_{\min,G}}$ , assuming the two types of momenta lead to similar travel distance during one unit time. It is straightforward to check this assumption. At stationarity, HMC has a velocity  $\mathbf{v}_G \sim \mathcal{N}(\mathbf{0}, \mathbf{I})$ , so its velocity along any unit vector  $\mathbf{u}$  would be distributed as  $\langle \mathbf{v}_G, \mathbf{u} \rangle \sim \mathcal{N}(0, 1)$ , and the travel distance  $\mathbb{E}|\langle \mathbf{v}_G, \mathbf{u} \rangle| = \sqrt{2/\pi}$ . For Zigzag-HMC, as  $\langle \mathbf{v}_L, \mathbf{u} \rangle$  does not follow a simple distribution, we estimate  $\mathbb{E}|\langle \mathbf{v}_L, \mathbf{u} \rangle|$  by Monte Carlo simulation and it turns out to be  $\approx 0.8$ , close to  $\sqrt{2/\pi}$ .

We test this intuitive choice of  $r$  on a subset of the HIV data in [1] with 535 taxa, 5 binary and 3 continuous traits. We calculate the optimal  $r = \sqrt{\lambda_{\min,L}}/\sqrt{\lambda_{\min,G}} \approx 2.5$  with  $\Sigma_G$  and  $\Sigma_L$  estimated from the MCMC samples. Clearly,  $r$  has a significant impact on the efficiency as a very small or large  $r$  leads to lower ESS (Table 1). Also, an  $r$  in the order of our optimal value generates the best result, so we recommend this on-the-fly automatic tuning  $r = \sqrt{\lambda_{\min,L}}/\sqrt{\lambda_{\min,G}}$  (Table 1).

Table 1: Minimal effective sample size (ESS) per running hour (hr) for partial correlation matrix elements  $r_{ij}$  with different  $r$  ( $N = 535, P_{\text{disc}} = 5, P_{\text{cont}} = 3$ ). ESS values report medians across 3 independent simulations.

| $r$ | ESS/hr     |            |
|-----|------------|------------|
|     | min        | median     |
| 0.1 | 32         | 266        |
| 1   | 106        | 771        |
| 10  | <b>118</b> | <b>855</b> |
| 100 | 25         | 110        |

## References

1. Zhang Z, Nishimura A, Bastide P, Ji X, Payne RP, Goulder P, et al. Large-scale inference of correlation among mixed-type biological traits with phylogenetic multivariate probit models. *The Annals of Applied Statistics*. 2021;15(1):230–251.
