# Supplementary material for: Accelerating Bayesian inference of dependency between mixed-type biological traits
Source: PubMed Central journal article supplement (PMC10491301; doi:10.1371/journal.pcbi.1011419), 2023-08-28
Supplement: pcbi.1011419.s003.pdf [file pcbi.1011419.s003.pdf]

Fig S1. Histograms of per run-time ESS for  $r_{ij}$

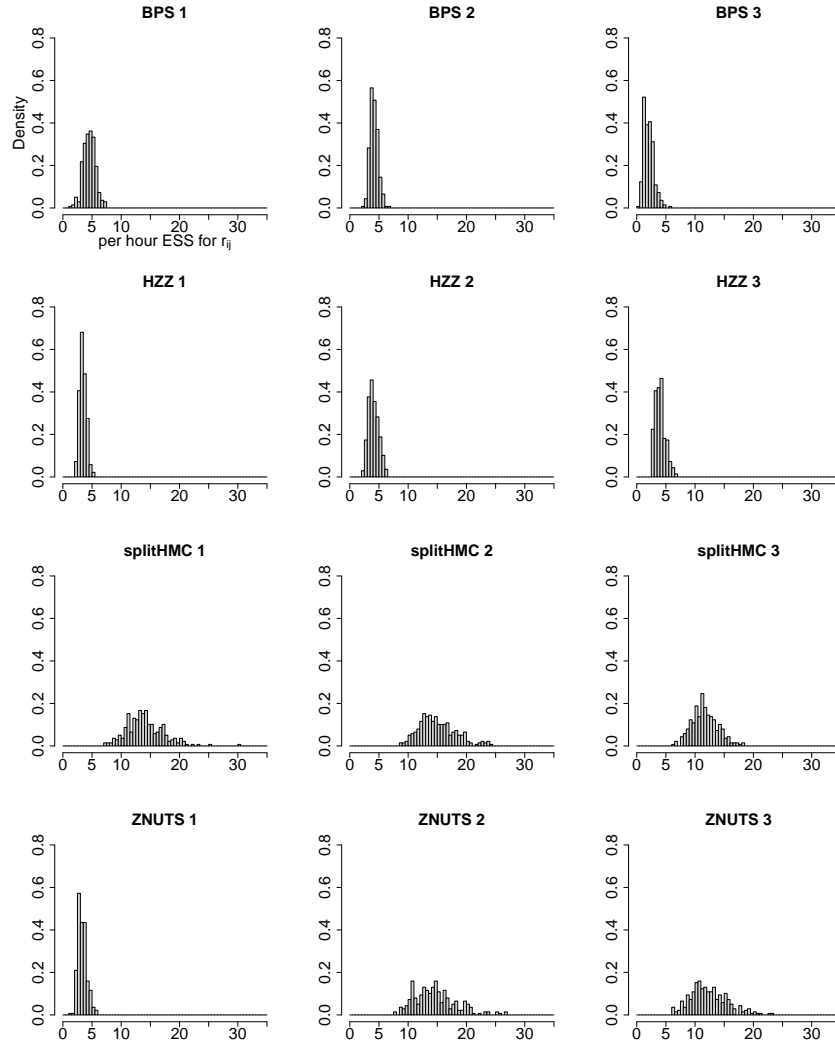

Fig S1: Histograms of per-hour run-time ESS for  $\mathbf{R}$  elements, as discussed in Section “Efficiency gain from the new inference scheme”. Each sampling scheme includes three independent repeats (1, 2, 3), and the x-axis and y-axis are consistent across all subfigures.
